# Supplementary material for: Eluting mode of photodynamic nanofibers without photosensitizer leakage for one-stop treatment of outdoor hemostasis and sterilizing superbacteria
Source: Royal Society of Chemistry journal article supplement (doi:10.1039/d1nr00179e), 2021-01-01
Supplement: d1nr00179e1.pdf [file d1nr00179e1.pdf]

## Supporting Information

### **Eluting mode of photodynamic nanofibers without photosensitizer leakage for one-stop service of outdoor hemostasis and sterilizing superbacteria**

*Jun Zhang<sup>a,\*</sup>, Chun-Li Liu<sup>a</sup>, Jiang-Jun Liu<sup>b</sup>, Xiao-Han Bai<sup>a</sup>, Zhi-Kai Cao<sup>a</sup>, Jun Yang<sup>a</sup>,  
Miao Yu<sup>c</sup>, Seeram Ramakrishna<sup>d</sup>, Yun-Ze Long<sup>a,\*</sup>*

<sup>a</sup> Collaborative Innovation Center for Nanomaterials & Devices, College of Physics, Qingdao University, Qingdao 266071, P. R. China

<sup>b</sup> Medical College, Qingdao University, Qingdao 266071, China

<sup>c</sup> Department of Mechanical Engineering, Columbia University, New York, NY 10027, USA

<sup>d</sup> Center for Nanofibers & Nanotechnology, Department of Mechanical Engineering, National University of Singapore, Singapore 117574, Singapore

-----  
\* Corresponding author.

E-mail: [iamjunzhang@163.com](mailto:iamjunzhang@163.com); [yunze.long@qdu.edu.cn](mailto:yunze.long@qdu.edu.cn)

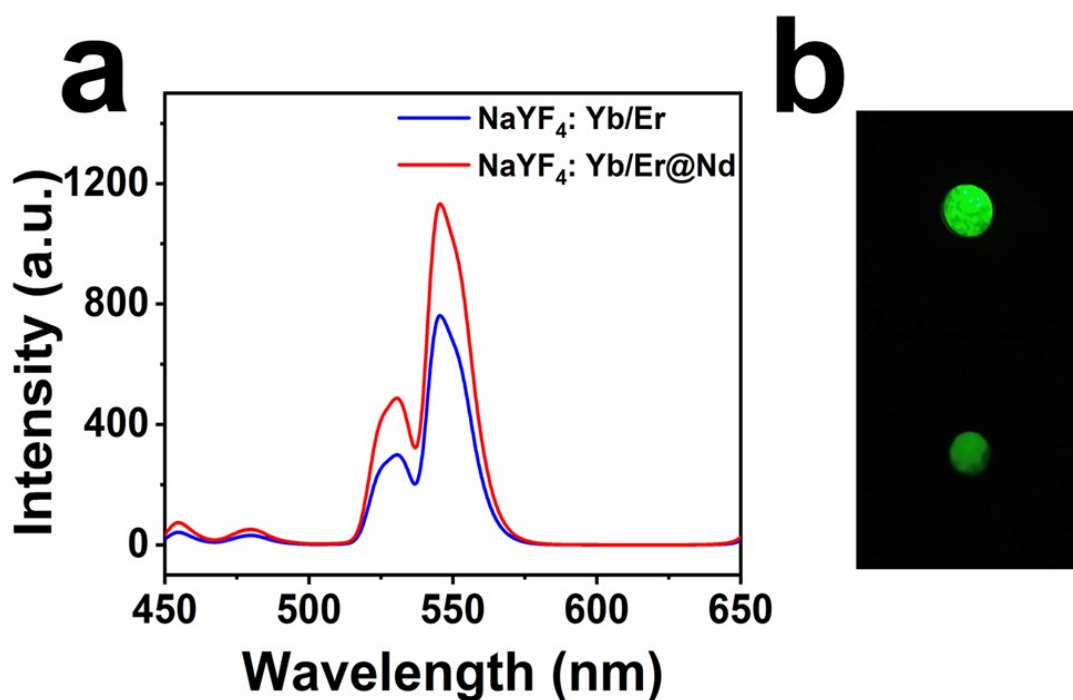

**Figure S1.** (a) PL spectrum of NaYF<sub>4</sub>:Yb/Er and NaYF<sub>4</sub>:Yb/Er@NaYF<sub>4</sub>:Nd core-shell nanoparticles. (b) NaYF<sub>4</sub>:Yb/Er@NaYF<sub>4</sub>:Nd core-shell nanoparticles shows brighter green color emission than that of NaYF<sub>4</sub>:Yb/Er nanoparticles.

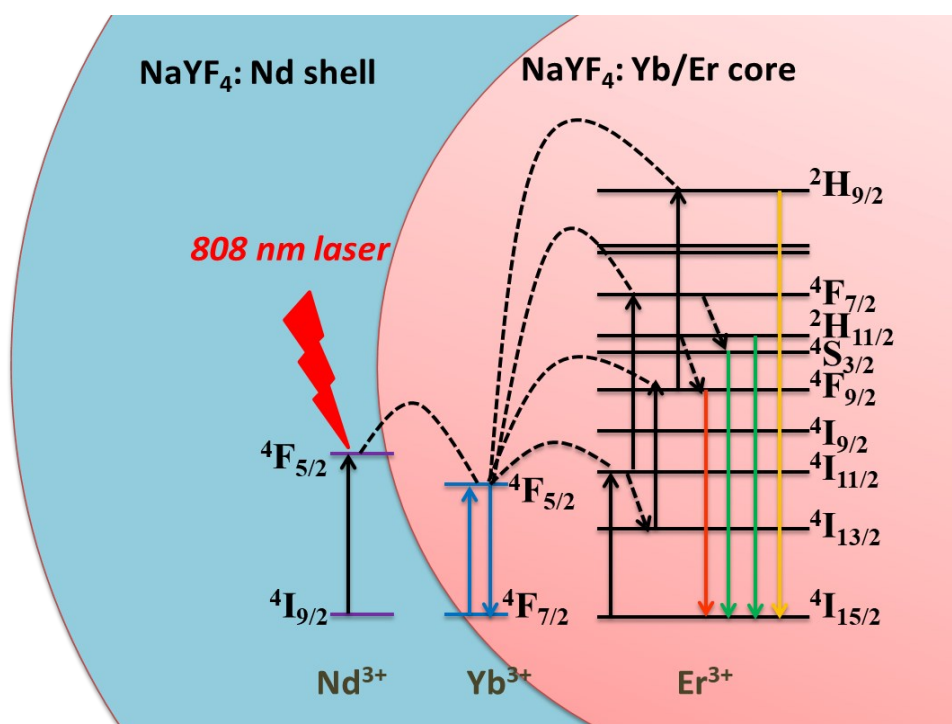

**Figure S2.** Schematic illustration of energy transfer and pathway from NaYF<sub>4</sub>:Yb/Er@NaYF<sub>4</sub>:Nd shell to NaYF<sub>4</sub>:Yb/Er core under 808 nm laser excitation.

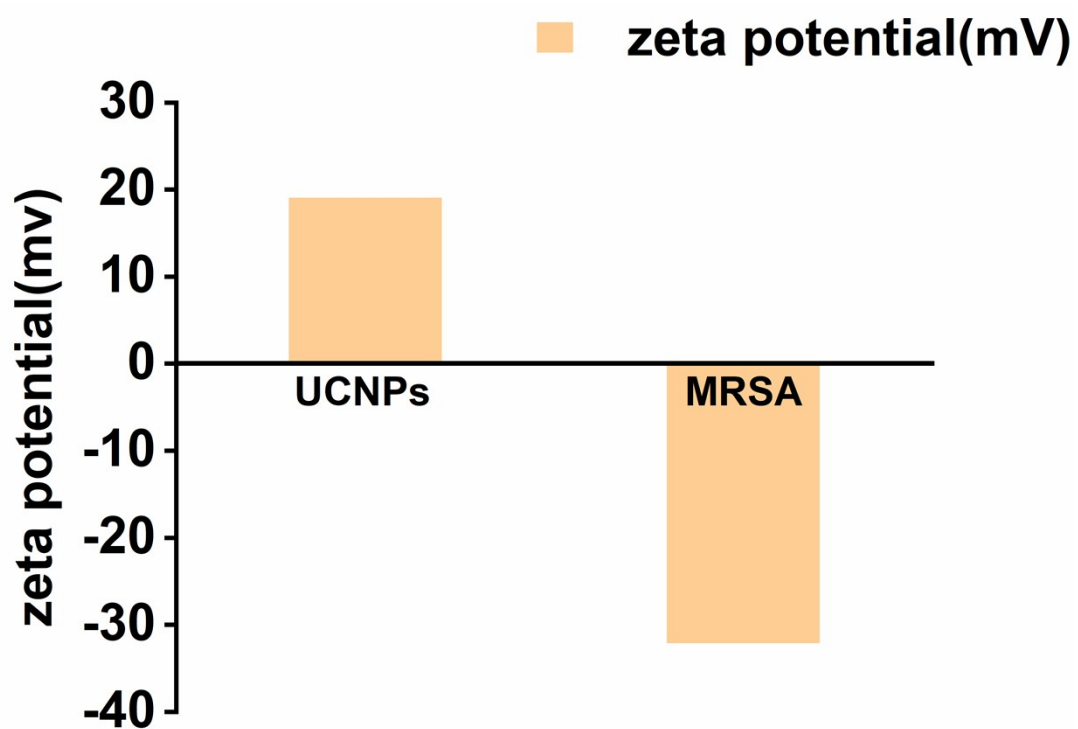

**Figure S3.** Zeta potential of the UCNPs@hypericin composite nanoparticles and MRSA.

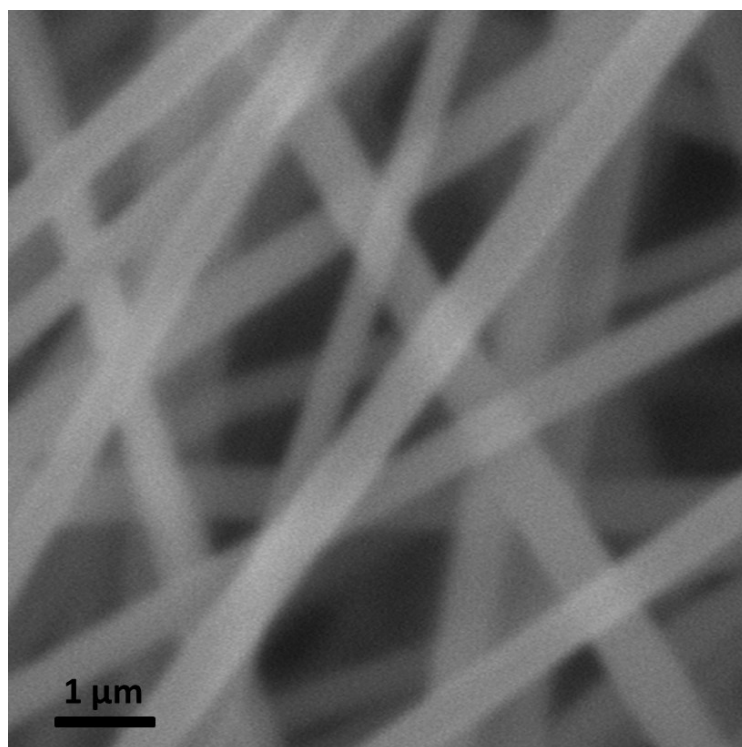

**Figure S4.** SEM image of nanofibers obtained by traditional electrospinning device.

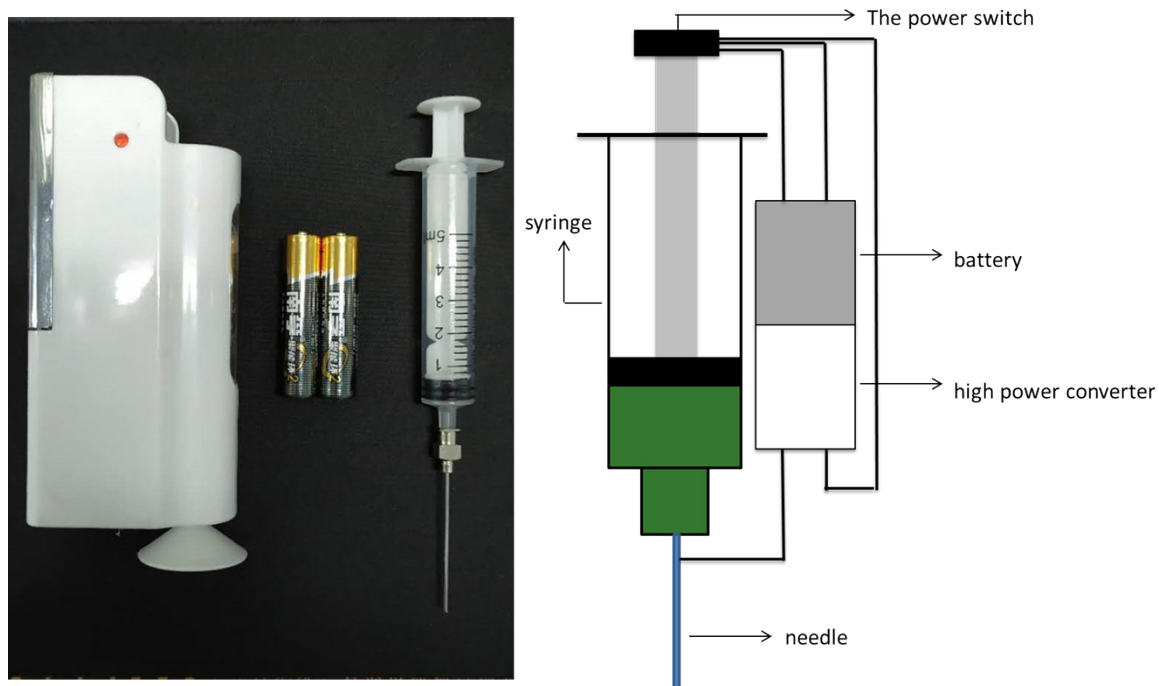

**Figure S5.** A light, small in size and portable electrospinning device powered by battery is developed for outdoor use (150 g in total weight), and its structure diagram.

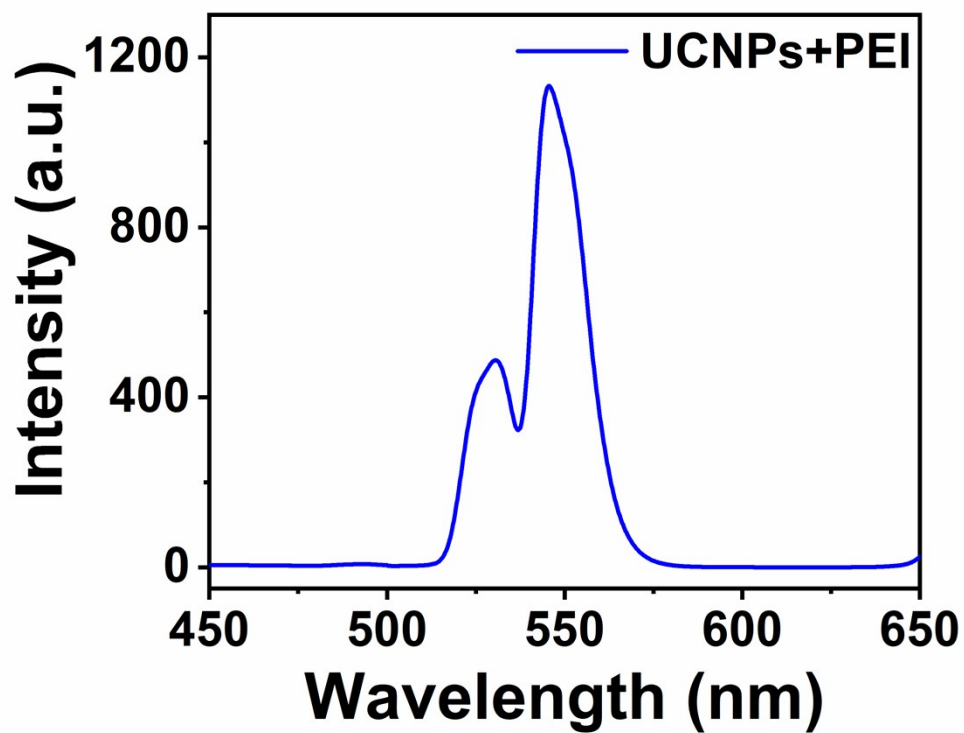

**Figure S6.** PL spectrum of UCNP+PEI.

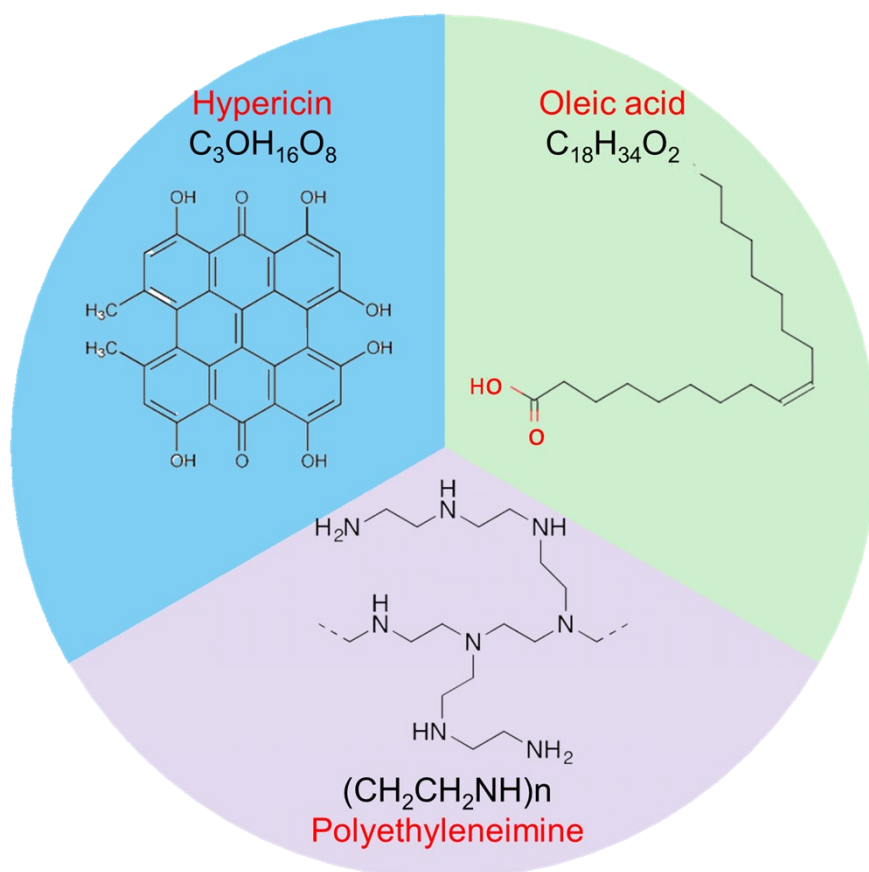

**Figure S7.** Structural formula of hypericin, oleic acid, and PEI.

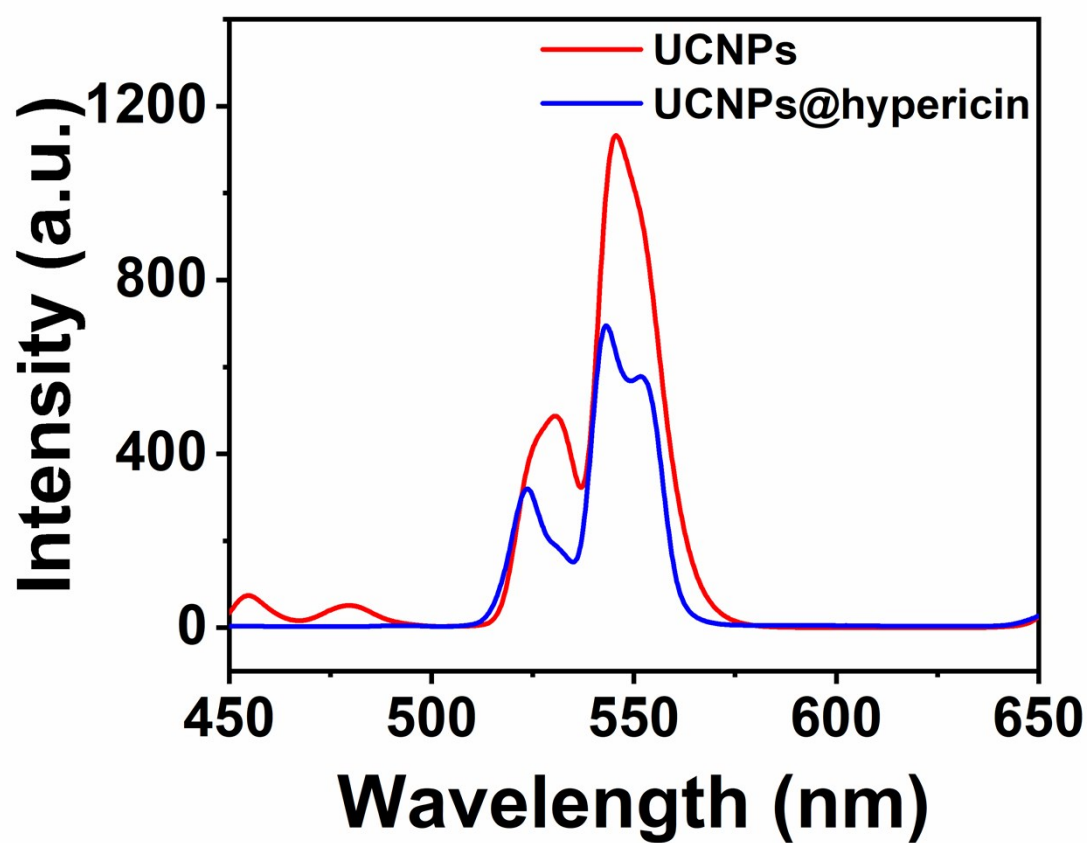

**Figure S8.** PL spectrum of UCNPs before and after coated with hypericin shell.

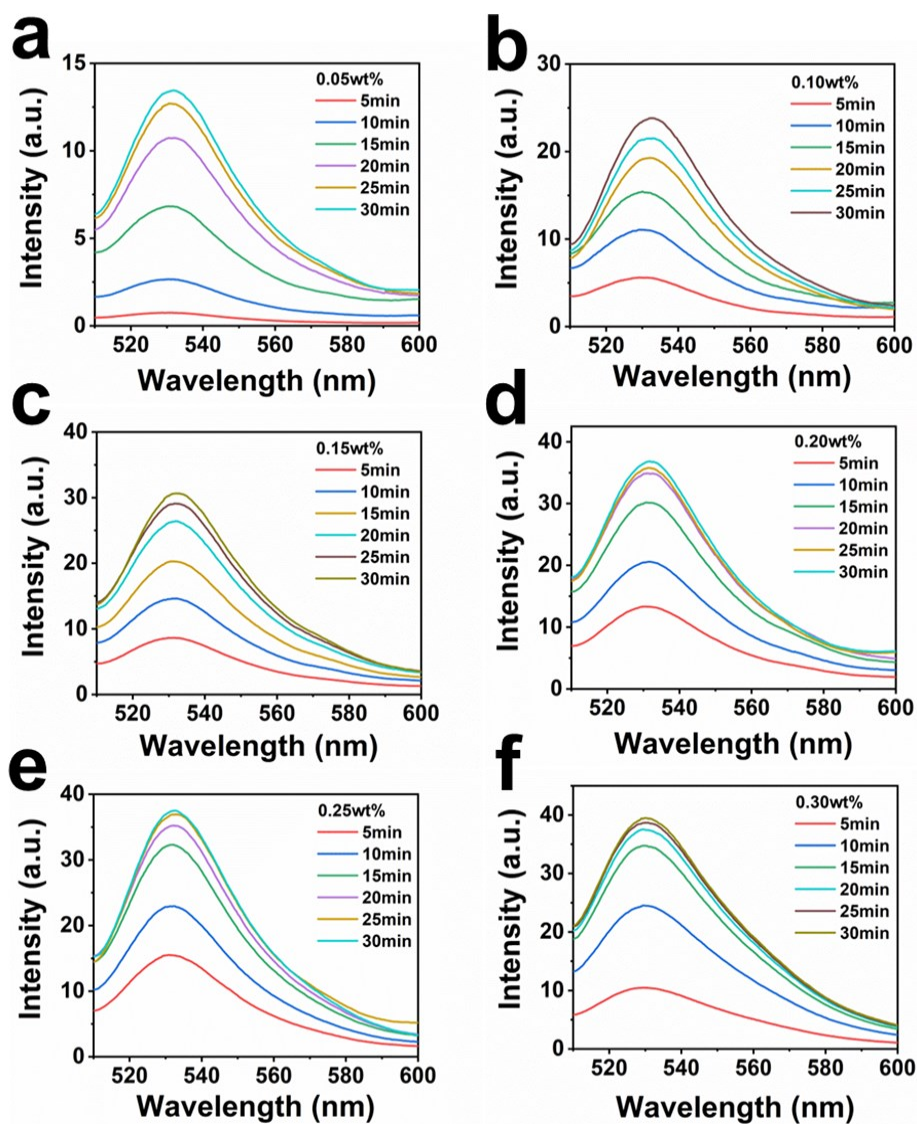

**Figure S9.** PL spectra of SOSG with nanocomposite fiber membrane doped with UCNPs@hypericin of different concentration: (a) 0.05 wt%, (b) 0.10 wt%, (c) 0.15 wt%, (d) 0.20 wt%, (e) 0.25 wt%, (f) 0.30wt%, when exposed to 808nm irradiation of 0~30 min.

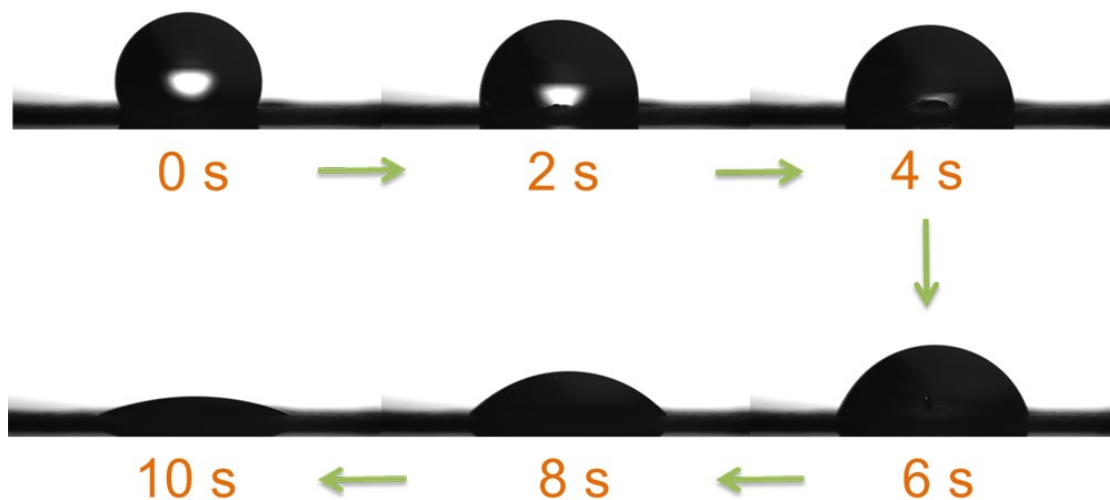

**Figure S10.** Water contact angle measurement of nanocomposite fiber membrane using body fluid.

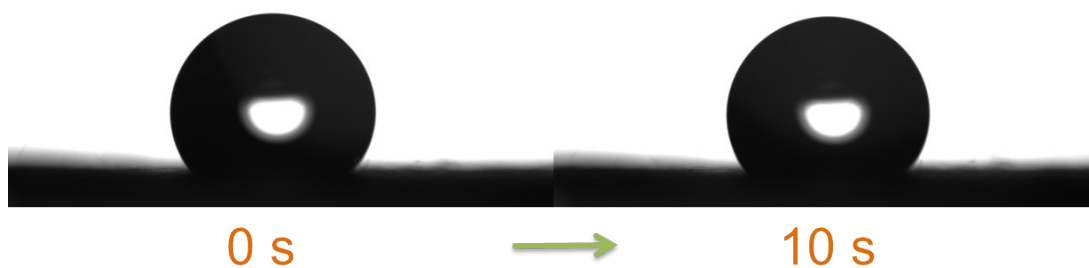

**Figure S11.** Water contact angle measurement of pure PCL fiber membrane using body fluid.

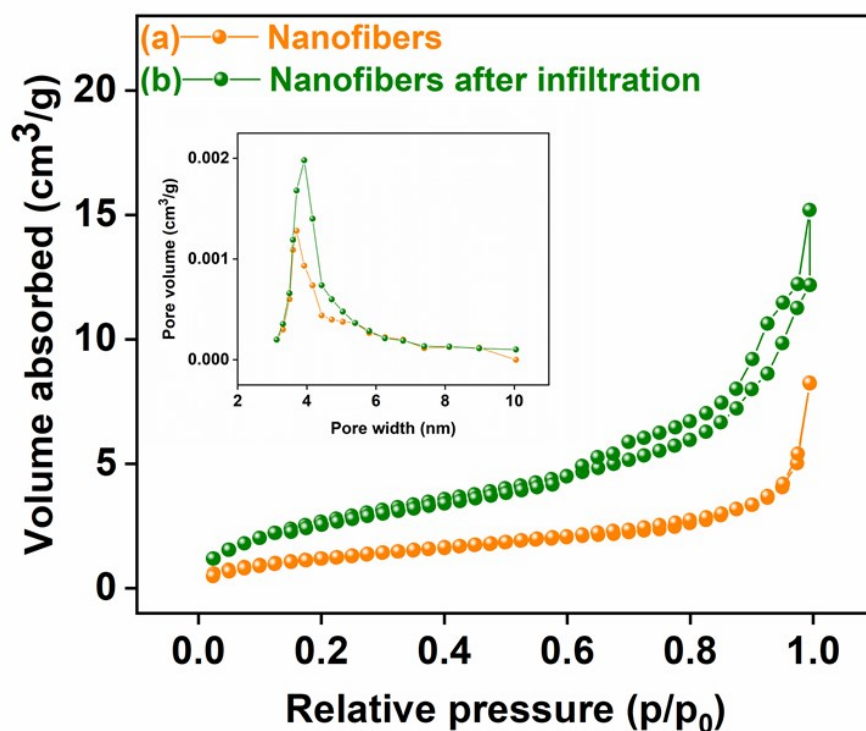

**Figure S12.** Nitrogen physisorption isotherms and (inset) the pore size distribution curve of nanocomposite fiber membrane (a) before and (b) after soaking in body fluid.

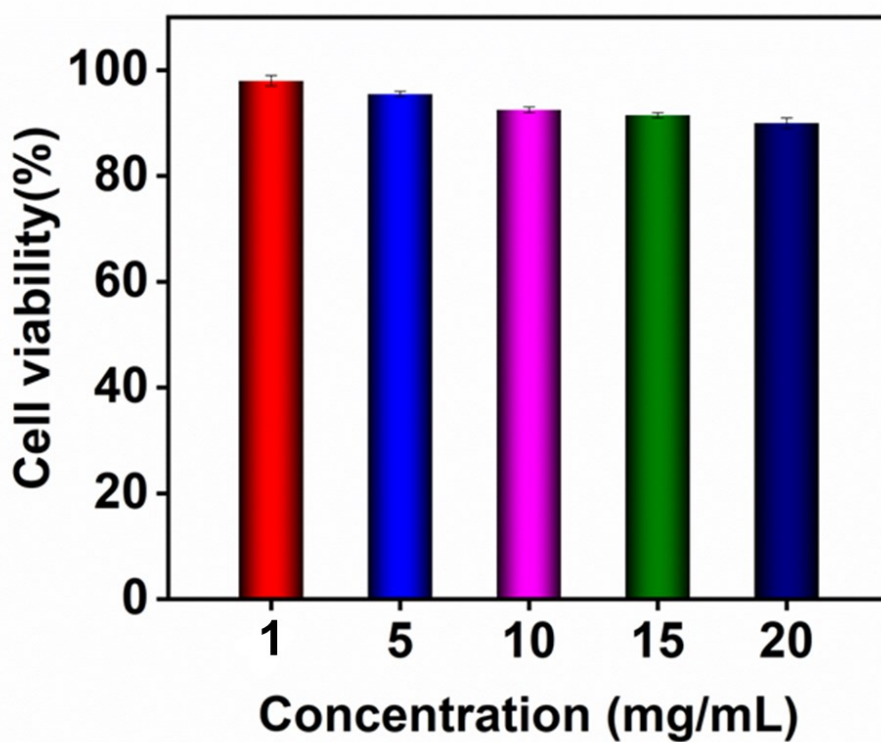

**Figure S13.** The biocompatibility of nanocomposite fiber membrane analyzed using MTT assay. The L929 fibroblast cells incubated with fiber membranes for 36 h.

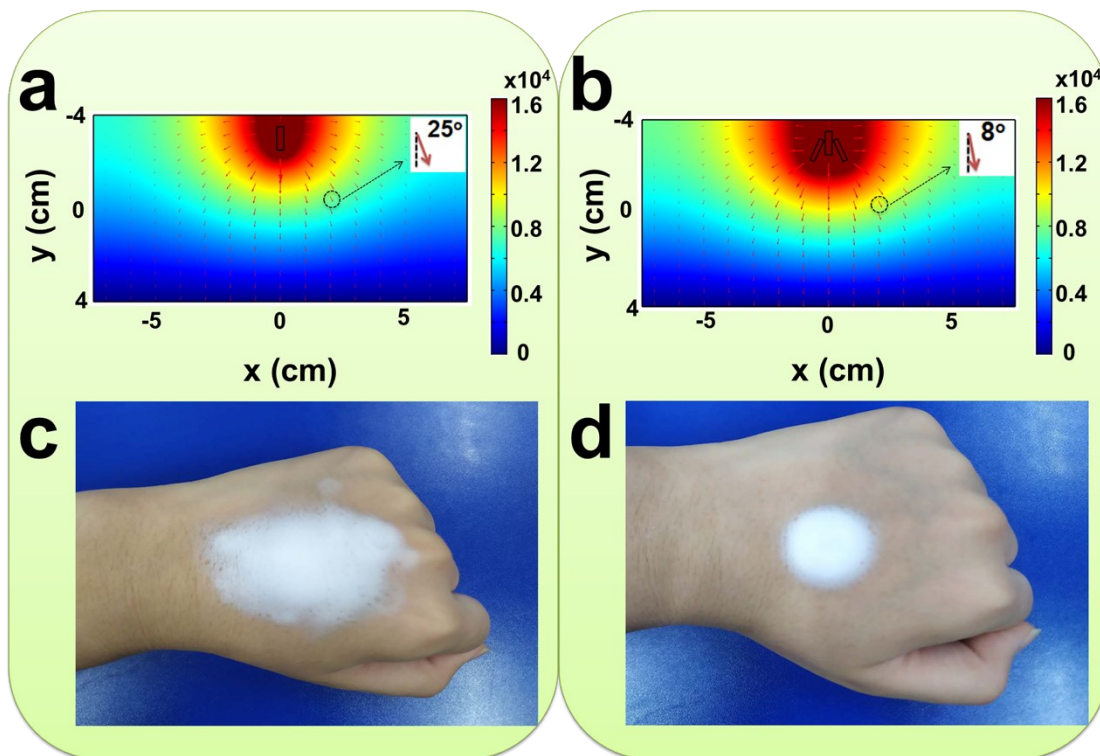

**Figure S14.** Electric field line simulation: (a) Traditional electrospinning; (b) Auxiliary electrode electrospinning. Insets are enlarged images of angles between the electric field line (red) and vertical direction (black). (c-d) Photographs of their deposition area by these two kinds of electrospinning method.

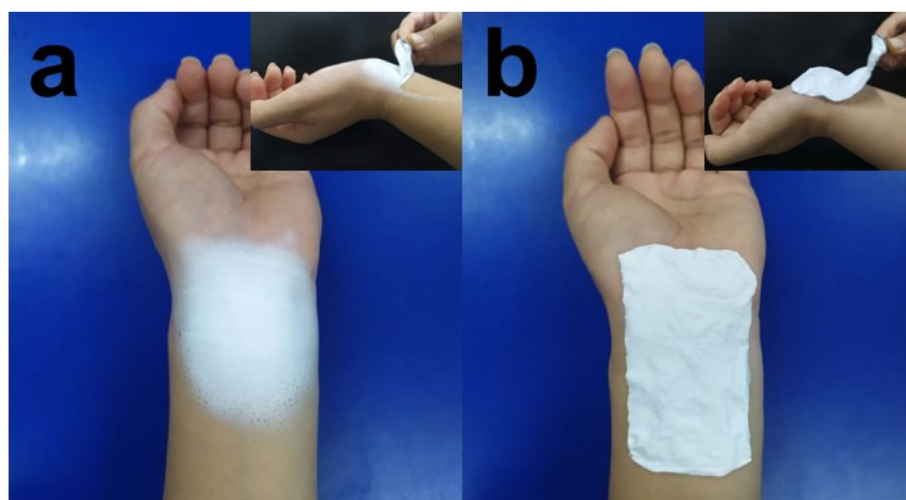

**Figure S15.** (a) *In-situ* electrospun nanofibers deposited onto the skin showing a good adhesiveness and compactness. (b) On the contrary, traditional electrospun nanofiber membrane pressed onto the skin, which shows bad compactness and there exists an air spacer.
